# Supplementary material for: An integrative approach to uncover the components, mechanisms, and functions of traditional Chinese medicine prescriptions on male infertility
Source: Front Pharmacol. 2022 Aug 11;13:794448. doi: 10.3389/fphar.2022.794448 (PMC9403420; doi:10.3389/fphar.2022.794448)
Supplement: Supplementary file 5 [file DataSheet2.xls]

## Sheet: Sheet1
Supplementary Table 2. Bioactive components of each herb in CCMM
Herb_name	Mol ID	Molecule Name	MW	AlogP	Hdon	Hacc	OB (%)	Caco-2	BBB	DL	FASA-	HL	PubChem_Cid	CanoniCal SMILES
Gynochthodes officinalis (F.C.How) Razafim. & B.Bremer	MOL000358	beta-sitosterol	414.79	8.084	1	1	36.9139	1.32463	0.98588	0.75123	0.225506	5.35549	222284	CCC(CCC(C)C1CCC2C1(CCC3C2CC=C4C3(CCC(C4)O)C)C)C(C)C
Gynochthodes officinalis (F.C.How) Razafim. & B.Bremer	MOL000359	sitosterol	414.79	8.084	1	1	36.9139	1.32059	0.87298	0.7512	0.224795	5.37109	12303645	CCC(CCC(C)C1CCC2C1(CCC3C2CC=C4C3(CCC(C4)O)C)C)C(C)C
Gynochthodes officinalis (F.C.How) Razafim. & B.Bremer	MOL001506	Supraene	410.8	11.331	0	0	33.5459	2.08183	1.73017	0.42161	0.270387	2.72145	638072	CC(=CCCC(=CCCC(=CCCC=C(C)CCC=C(C)CCC=C(C)C)C)C)C
Gynochthodes officinalis (F.C.How) Razafim. & B.Bremer	MOL002879	Diop	390.62	7.439	0	4	43.5933	0.7934	0.26014	0.39247	0.276595	3.59931	33934	CC(C)CCCCCOC(=O)C1=CC=CC=C1C(=O)OCCCCCC(C)C
Gynochthodes officinalis (F.C.How) Razafim. & B.Bremer	MOL002883	Ethyl oleate (NF)	310.58	7.435	0	2	32.3974	1.40295	1.10325	0.19061	0.192639	4.85027	5363269	CCCCCCCCC=CCCCCCCCC(=O)OCC
Gynochthodes officinalis (F.C.How) Razafim. & B.Bremer	MOL006147	Alizarin-2-methylether	254.25	2.525	1	4	32.8088	0.61959	-0.13659	0.20971	0	30.8237	80103	COC1=C(C2=C(C=C1)C(=O)C3=CC=CC=C3C2=O)O
Gynochthodes officinalis (F.C.How) Razafim. & B.Bremer	MOL009495	2-hydroxy-1,5-dimethoxy-6-(methoxymethyl)-9,10-anthraquinone	328.34	2.312	1	6	95.8517	0.54305	-0.17076	0.37249	0.241731	29.9763	16203753	COCC1=C(C2=C(C=C1)C(=O)C3=C(C2=O)C=CC(=C3OC)O)OC
Gynochthodes officinalis (F.C.How) Razafim. & B.Bremer	MOL009496	1,5,7-trihydroxy-6-methoxy-2-methoxymethylanthracenequinone	330.31	1.794	3	7	80.423	0.27379	-0.62549	0.37789	0.243966	28.2455		c1(O)c(COC)ccc2c1C(c3c(C2=O)c(O)c(OC)c(O)c3)=O
Gynochthodes officinalis (F.C.How) Razafim. & B.Bremer	MOL009500	1,6-dihydroxy-5-methoxy-2-(methoxymethyl)-9,10-anthraquinone	314.31	2.061	2	6	104.539	0.36762	-0.30228	0.33917	0.281002	29.0166	11674044	COCC1=C(C2=C(C=C1)C(=O)C3=C(C2=O)C=CC(=C3OC)O)O
Gynochthodes officinalis (F.C.How) Razafim. & B.Bremer	MOL009503	1-hydroxy-3-methoxy-9,10-anthraquinone	254.25	2.525	1	4	104.325	0.58585	-0.23769	0.20915	0.389478	30.7754	13412786	COC1=CC2=C(C(=C1)O)C(=O)C3=CC=CC=C3C2=O
Gynochthodes officinalis (F.C.How) Razafim. & B.Bremer	MOL009504	1-hydroxy-6-hydroxymethylanthracenequinone	254.25	1.937	2	4	81.7655	-0.03879	-0.7895	0.2115	0.420065	30.8005	44595036	C1=CC2=C(C(=C1)O)C(=O)C3=C(C2=O)C=C(C=C3)CO
Gynochthodes officinalis (F.C.How) Razafim. & B.Bremer	MOL009513	2-hydroxy-1,8-dimethoxy-7-methoxymethylanthracenequinone	328.34	2.312	1	6	112.303	0.45587	-0.29804	0.37164	0.253247	29.4351		c1(OC)c(O)ccc2c1C(c3c(C2=O)ccc(COC)c3OC)=O
Gynochthodes officinalis (F.C.How) Razafim. & B.Bremer	MOL009519	(2R,3S)-(+)-3',5-Dihydroxy-4 ,7-dimethoxydihydroflavonol	332.33	1.987	3	7	77.2378	0.12927	-0.38595	0.33461	0.293283	14.1278	5316762	COC1=C(C=C(C=C1)C2C(C(=O)C3=C(C=C(C=C3O2)OC)O)O)O
Gynochthodes officinalis (F.C.How) Razafim. & B.Bremer	MOL009524	3beta,20(R),5-alkenyl-stigmastol	414.79	8.084	1	1	36.9139	1.35994	0.89413	0.75074	0.2208	5.2205	7067828	CCC(CCC(C)C1CCC2C1(CCC3C2CC=C4C3(CCC(C4)O)C)C)C(C)C
Gynochthodes officinalis (F.C.How) Razafim. & B.Bremer	MOL009525	3beta-24S(R)-butyl-5-alkenyl-cholestol	456.88	9.248	1	1	35.3525	1.36151	0.79448	0.82221	0.22699	7.04491		C1C2C(CC=C4C2(C)CCC(O)C4)C3C(C(C(C)CCC(CCC(C)C)C(C)C)CC3)(C)C1
Gynochthodes officinalis (F.C.How) Razafim. & B.Bremer	MOL009537	americanin A	328.34	2.302	3	6	46.7057	-0.07814	-0.98128	0.34901	0.408651	2.60419		O1C(c2cc(O)c(O)cc2)C(CO)Oc3c1ccc(C=CC=O)c3
Gynochthodes officinalis (F.C.How) Razafim. & B.Bremer	MOL009541	Asperuloside tetraacetate	582.56	-1.033	0	15	45.4726	-1.39029	-1.73364	0.81584	0.343529	20.7159		O1C3C2C(C(COC(C)=O)=C3)C(OC=C2C1=O)OC4OC(COC(C)=O)C(C(C4OC(C)=O)OC(C)=O)OC(C)=O
Gynochthodes officinalis (F.C.How) Razafim. & B.Bremer	MOL009551	isoprincepin	494.53	2.519	5	9	49.1213	-0.18169	-1.47194	0.77375	0.317349	3.00373		C1(c3ccc(O)c(O)c3)Oc2c(OC1CO)ccc(C4OCC5C4COC5c6cc(O)c(O)cc6)c2
Gynochthodes officinalis (F.C.How) Razafim. & B.Bremer	MOL009558	2-hydroxyethyl 5-hydroxy-2-(2-hydroxybenzoyl)-4-(hydroxymethyl)benzoate	332.33	1.411	4	7	62.3161	-1.02324	-1.70524	0.25772	0.369691	17.6062	24763413	C1=CC=C(C(=C1)C(=O)C2=C(C=C(C(=C2)CO)O)C(=O)OCCO)O
Gynochthodes officinalis (F.C.How) Razafim. & B.Bremer	MOL009562	Ohioensin-A	372.39	3.569	3	5	38.1347	0.59512	-0.17336	0.75842	0.405048	15.0925		C1(CC2C3c4c1c(O)cc(O)c4c5c(C3Oc6c2cccc6)cc(O)cc5)=O
Cuscuta chinensis Lam.	MOL000098	quercetin	302.25	1.5	5	7	46.43	0.05	-0.77	0.28	0.38	14.4	5280343	C1=CC(=C(C=C1C2=C(C(=O)C3=C(C=C(C=C3O2)O)O)O)O)O
Cuscuta chinensis Lam.	MOL000422	kaempferol	286.25	1.77	4	6	41.88	0.26	-0.55	0.24	0	14.74	5280863	C1=CC(=CC=C1C2=C(C(=O)C3=C(C=C(C=C3O2)O)O)O)O
Cuscuta chinensis Lam.	MOL000358	beta-sitosterol	414.79	8.08	1	1	36.91	1.32	0.99	0.75	0.23	5.36	222284	CCC(CCC(C)C1CCC2C1(CCC3C2CC=C4C3(CCC(C4)O)C)C)C(C)C
Cuscuta chinensis Lam.	MOL000184	NSC63551	412.77	7.56	0	1	39.25	1.42	1.22	0.76	0.22	5.78	5356634	CCC(C=CC(C)C1CCC2C1(CCC3C2CCC4C3(CCC(=O)C4)C)C)C(C)C
Cuscuta chinensis Lam.	MOL000354	isorhamnetin	316.28	1.76	4	7	49.6	0.31	-0.54	0.31	0.32	14.34	5281654	COC1=C(C=CC(=C1)C2=C(C(=O)C3=C(C=C(C=C3O2)O)O)O)O
Cuscuta chinensis Lam.	MOL000953	CLR	386.73	7.38	1	1	37.87	1.43	1.13	0.68	0.2	4.52	5997	CC(C)CCCC(C)C1CCC2C1(CCC3C2CC=C4C3(CCC(C4)O)C)C
Cuscuta chinensis Lam.	MOL001558	sesamin	354.38	2.24	0	6	56.55	0.75	-0.08	0.83	0.31	13.44	72307	C1C2C(COC2C3=CC4=C(C=C3)OCO4)C(O1)C5=CC6=C(C=C5)OCO6
Cuscuta chinensis Lam.	MOL005043	campest-5-en-3beta-ol	400.76	7.63	1	1	37.58	1.32	0.94	0.71	0.23	4.43	173183	CC(C)C(C)CCC(C)C1CCC2C1(CCC3C2CC=C4C3(CCC(C4)O)C)C
Cuscuta chinensis Lam.	MOL005440	Isofucosterol	412.77	7.83	1	1	43.78	1.36	0.97	0.76	0.24	5.18	5281326	CC=C(CCC(C)C1CCC2C1(CCC3C2CC=C4C3(CCC(C4)O)C)C)C(C)C
Cuscuta chinensis Lam.	MOL005944	matrine	248.41	1.42	0	3	63.77	1.39	1.52	0.25	0	6.69		C12C3C4N(C(CCC4)=O)CC1CCCN2CCC3
Cuscuta chinensis Lam.	MOL006649	sophranol	264.41	0.67	1	4	55.42	0.6	0.68	0.28	0.19	4.94		OC23C1N(CCC3)CCCC1C4N(C(CCC4)=O)C2
Cuscuta chinensis Lam.	MOL009303	Cuscutoside B	664.67	-1.17	6	16	47.56	-1.62	-2.59	0.18	0.24	21.82		O(c4cc3c(OCO3)cc4C5OCC6C5COC6c8cc7c(OCO7)cc8)C1C(C(C(C(COC2C(C(C(CO2)O)O)O)O1)O)O)O
Cuscuta chinensis Lam.	MOL005438	campesterol	400.76	7.63	1	1	37.58	1.34	0.95	0.71	0.22	4.83		OC4CC3=CCC2C1C(CCC2C3(C)CC4)(C)C(C(C)CCC(C)C(C)C)CC1
Lycium barbarum L.	MOL000098	quercetin	302.25	1.504	5	7	46.4333	0.04842	-0.7689	0.27525	0.384534	14.4005	5280343	C1=CC(=C(C=C1C2=C(C(=O)C3=C(C=C(C=C3O2)O)O)O)O)O
Lycium barbarum L.	MOL000358	beta-sitosterol	414.79	8.084	1	1	36.9139	1.32463	0.98588	0.75123	0.225506	5.35549	222284	CCC(CCC(C)C1CCC2C1(CCC3C2CC=C4C3(CCC(C4)O)C)C)C(C)C
Lycium barbarum L.	MOL000449	Stigmasterol	412.77	7.64	1	1	43.8299	1.44458	1.00045	0.75665	0.216794	5.5746	5280794	CCC(C=CC(C)C1CCC2C1(CCC3C2CC=C4C3(CCC(C4)O)C)C)C(C)C
Lycium barbarum L.	MOL000953	CLR	386.73	7.376	1	1	37.8739	1.43101	1.12678	0.67677	0.198672	4.51883	5997	CC(C)CCCC(C)C1CCC2C1(CCC3C2CC=C4C3(CCC(C4)O)C)C
Lycium barbarum L.	MOL001323	Sitosterol alpha1	426.8	8.153	1	1	43.2813	1.41477	0.97257	0.78354	0.237165	5.64077	9548595	CC=C(CCC(C)C1CCC2C1(CCC3C2=CCC4C3(CCC(C4C)O)C)C)C(C)C
Lycium barbarum L.	MOL001494	Mandenol	308.56	6.991	0	2	41.9962	1.45585	1.13821	0.19321	0.24769	5.38597	5282184	CCCCCC=CCC=CCCCCCCCC(=O)OCC
Lycium barbarum L.	MOL001495	Ethyl linolenate	306.54	6.546	0	2	46.101	1.53656	1.12378	0.19716	0.248	6.20051	6371716	CCC=CCC=CCC=CCCCCCCCC(=O)OCC
Lycium barbarum L.	MOL001979	LAN	426.8	8.12	1	1	42.1192	1.51641	1.17987	0.74787	0.234899	5.83549	246983	CC(CCC=C(C)C)C1CCC2(C1(CCC3=C2CCC4C3(CCC(C4(C)C)O)C)C)C
Lycium barbarum L.	MOL003578	Cycloartenol	426.8	7.554	1	1	38.6857	1.52617	1.33261	0.78093	0	5.00372		C123C4(C(CCC1C5(C)C(C(C(C)CCC=C(C)C)CC5)(C)CC3)C(C)(C)C(O)CC4)C2
Lycium barbarum L.	MOL005406	atropine	289.41	1.721	1	4	45.9706	0.42984	0.01478	0.19328	0.281506	2.7474	154417	CN1C2CCC1CC(C2)OC(=O)C(CO)C3=CC=CC=C3
Lycium barbarum L.	MOL005438	campesterol	400.76	7.628	1	1	37.5768	1.34459	0.94546	0.71488	0.223869	4.83204		OC4CC3=CCC2C1C(CCC2C3(C)CC4)(C)C(C(C)CCC(C)C(C)C)CC1
Lycium barbarum L.	MOL006209	cyanin	411.66	7.077	0	1	47.4209	1.78221	0.99102	0.75918	0.276261	2.72377		c12c(N(CCC(C)C)C=CC1=Cc3c4c(cccc4)n(CCC(C)C)cc3)cccc2
Lycium barbarum L.	MOL007449	24-methylidenelophenol	412.77	7.751	1	1	44.1926	1.40625	1.0016	0.7533	0.24066	5.10354	5283640	CC1C(CCC2(C1CC=C3C2CCC4(C3CCC4C(C)CCC(=C)C(C)C)C)C)O
Lycium barbarum L.	MOL008173	daucosterol_qt	414.79	8.084	1	1	36.9139	1.33489	0.85459	0.75316	0.225396	5.59767		C12(C)C(CCC1C(C)CCC(CC)C(C)C)C4C(CC2)C3(C)C(CC(CC3)O)=CC4
Lycium barbarum L.	MOL008400	glycitein	284.28	2.316	2	5	50.4789	0.56176	-0.28745	0.23826	0.301433	16.3203	5317750	COC1=C(C=C2C(=C1)C(=O)C(=CO2)C3=CC=C(C=C3)O)O
Lycium barbarum L.	MOL009604	14b-pregnane	288.57	6.535	0	0	34.7792	1.79765	1.94933	0.33723	0.19898	4.57057		C1CCC4(C)C(CCC2C3CCC(C3(CCC24)C)CC)C1
Lycium barbarum L.	MOL009612	(24R)-4alpha-Methyl-24-ethylcholesta-7,25-dien-3beta-ylacetate	482.87	8.793	0	2	46.3575	1.39199	0.99718	0.8398	0.263765	8.24664		C1C(OC(C)=O)C(C)C2C(C3C(C4(C)C(C(C(C)CCC(CC)C(C)=C)CC4)(C)CC3)=CC2)(C)C1
Lycium barbarum L.	MOL009615	24-Methylenecycloartan-3beta,21-diol	456.83	6.701	2	2	37.3173	0.94675	0.29732	0.79751	0.226999	5.67062		C1(O)CCC23C(CCC4C2(C3)CCC5(C)C4(C)CCC5C(CCC(C(C)C)=C)CO)C1(C)C
Lycium barbarum L.	MOL009617	24-ethylcholest-22-enol	414.79	7.89	1	1	37.0945	1.33358	0.99239	0.7511	0.21277	5.32023		C1(O)CCC4(C)C(CCC2C3CCC(C3(CCC24)C)C(C)C=CC(CC)C(C)C)C1
Lycium barbarum L.	MOL009618	24-ethylcholesta-5,22-dienol	412.77	7.64	1	1	43.8299	1.31182	0.83918	0.75636	0.21982	5.76129		C1(O)CCC4(C)C(C1)=CCC2C3CCC(C3(CCC24)C)C(C)C=CC(CC)C(C)C
Lycium barbarum L.	MOL009620	24-methyl-31-norlanost-9(11)-enol	428.82	8.153	1	1	37.9997	1.32891	0.93218	0.75092	0.231948	5.48718		OC4C(C)C3C(CC4)(C)C2=CCC1(C)C(CCC1C(C)CCC(C)C(C)C)(C)C2CC3
Lycium barbarum L.	MOL009621	24-methylenelanost-8-enol	440.83	8.426	1	1	42.3682	1.44305	1.18394	0.76769	0.249321	5.42759		C1C2=C(CCC4C2(C)CCC(O)C4(C)C)C3(C)C(C(C(C)CCC(C(C)C)=C)CC3)(C)C1
Lycium barbarum L.	MOL009622	Fucosterol	412.77	7.834	1	1	43.7764	1.33891	1.01263	0.75668	0.239204	5.43569	5281328	CC=C(CCC(C)C1CCC2C1(CCC3C2CC=C4C3(CCC(C4)O)C)C)C(C)C
Lycium barbarum L.	MOL009631	31-Norcyclolaudenol	440.83	8.042	1	1	38.6821	1.35248	0.93779	0.81391	0.253536	4.88016		CC(C2C1(C)C(C4C3(C5(C3)C(C(C)C(O)CC5)CC4)CC1)(C)CC2)CCCC(C(C)=C)C
Lycium barbarum L.	MOL009633	31-norlanost-9(11)-enol	414.79	7.902	1	1	38.3539	1.33752	1.02901	0.7249	0.222897	5.37166		OC4C(C)C3C(CC4)(C)C2=CCC1(C)C(CCC1C(C)CCCC(C)C)(C)C2CC3
Lycium barbarum L.	MOL009634	31-norlanosterol	412.77	7.846	1	1	42.2046	1.40126	1.02731	0.73012	0.237091	5.26843		C1(O)CCC4(C)C(CCC2=C4CCC3(C)C2(C)CCC3C(C)CCC=C(C)C)C1C
Lycium barbarum L.	MOL009635	4,24-methyllophenol	414.79	7.947	1	1	37.8347	1.42778	1.09906	0.74999	0.219496	4.90223		C1(O)C(C)C2C(C3C(C4C(C(C(C)CCC(C)C(C)C)CC4)(C)CC3)=CC2)(C)CC1
Lycium barbarum L.	MOL009639	Lophenol	400.76	7.695	1	1	38.1294	1.36486	1.09998	0.714	0.20399	4.75787	160482	CC1C(CCC2(C1CC=C3C2CCC4(C3CCC4C(C)CCCC(C)C)C)C)O
Lycium barbarum L.	MOL009640	4alpha,14alpha,24-trimethylcholesta-8,24-dienol	426.8	8.293	1	1	38.9099	1.39949	1.0576	0.75772	0.240176	6.67402		C1(O)CCC4(C)C(CCC2=C4CCC3(C)C2(C)CCC3C(C)CCC(C)=C(C)C)C1C
Lycium barbarum L.	MOL009641	4alpha,24-dimethylcholesta-7,24-dienol	412.77	7.892	1	1	42.653	1.4312	0.97601	0.75297	0.231459	5.4397		C1(O)CCC4(C)C(CC=C2C3CCC(C3(CCC24)C)C(C)CCC(C)=C(C)C)C1C
Lycium barbarum L.	MOL009642	4alpha-methyl-24-ethylcholesta-7,24-dienol	426.8	8.348	1	1	42.2951	1.44898	1.08442	0.78304	0.226908	5.83048		C1(O)CCC4(C)C(CC=C2C3CCC(C3(CCC24)C)C(C)CCC(CC)=C(C)C)C1C
Lycium barbarum L.	MOL009644	6-Fluoroindole-7-Dehydrocholesterol	402.7	7.036	1	2	43.726	1.0337	0.54449	0.72224	0.237341	5.10312		OC4CC3=C(F)C=C2C1C(CCC2C3(C)CC4)(C)C(C(C)CCCC(C)C)CC1
Lycium barbarum L.	MOL009646	7-O-Methylluteolin-6-C-beta-glucoside_qt	318.3	2.014	4	7	40.7737	0.33243	-0.46685	0.30497	0.29483	14.0991		Oc1c(O)c2c(OC(c3cc(O)c(O)cc3)CC2=O)cc1OC
Lycium barbarum L.	MOL009650	Atropine	289.41	1.721	1	4	42.159	0.56932	0.39129	0.19299	0.259395	5.27434	637577	CN1C2CCC1CC(C2)OC(=O)C(CO)C3=CC=CC=C3
Lycium barbarum L.	MOL009651	Cryptoxanthin monoepoxide	568.96	9.5	1	2	46.9537	1.48975	-0.03313	0.56103	0.326123	4.40133		C1C(O)CC2(C)C(O2)(C=CC(C)=CC=CC(C)=CC=CC=C(C)C=CC=C(C)C=CC3=C(C)CCCC3(C)C)C1(C)C
Lycium barbarum L.	MOL009653	Cycloeucalenol	426.8	7.586	1	1	39.7265	1.41559	1.0419	0.79446	0.22942	5.00947		OC5C(C)C4C2(CC5)C1(C(CC4)C3(C)C(C(C(C)CCC(C(C)C)=C)CC3)(C)CC1)C2
Lycium barbarum L.	MOL009656	(E,E)-1-ethyl octadeca-3,13-dienoate	308.56	6.991	0	2	41.9962	1.45588	1.1072	0.19364	0.207136	5.47134		C(CC=CCCCCCCCCC=CCCCC)(OCC)=O
Lycium barbarum L.	MOL009660	methyl (1R,4aS,7R,7aS)-4a,7-dihydroxy-7-methyl-1-[(2S,3R,4S,5S,6R)-3,4,5-trihydroxy-6-(hydroxymethyl)oxan-2-yl]oxy-1,5,6,7a-tetrahydrocyclopenta[d]pyran-4-carboxylate	406.43	-3.181	6	11	39.4285	-1.4258	-2.05543	0.46558	0.232203	7.6382	11968619	CC1(CCC2(C1C(OC=C2C(=O)OC)OC3C(C(C(C(O3)CO)O)O)O)O)O
Lycium barbarum L.	MOL009662	Lantadene A	552.87	7.206	1	5	38.6794	0.31516	-0.29768	0.57405	0.303712	5.4373		C1C(C(C)(C)C2C(C3C(C4(C)C(C5C(C(OC(C(C)=CC)=O)CC(C)(C)C5)(C(O)=O)CC4)=CC3)(C)CC2)(C)C1)=O
Lycium barbarum L.	MOL009664	Physalin A	526.58	0.497	3	10	91.7065	-0.78303	-1.10928	0.27207	0.389406	13.2135		C1=CCC2=CC(O)C3C(CCC4(O)C56C(C7(C)C(C(OC(C7)C5(C)OC4=O)=O)=C)C(C3(O)O6)=O)C2(C)C1=O
Lycium barbarum L.	MOL009665	Physcion-8-O-beta-D-gentiobioside	608.6	-0.908	8	15	43.9036	-2.68432	-3.52314	0.62426	0.289226	28.4643	5320543	CC1=CC2=C(C(=C1)OC3C(C(C(C(O3)COC4C(C(C(C(O4)CO)O)O)O)O)O)O)C(=O)C5=C(C2=O)C=C(C=C5O)OC
Lycium barbarum L.	MOL009677	lanost-8-en-3beta-ol	428.82	8.37	1	1	34.2263	1.48075	1.24532	0.74036	0.216068	5.47725	440560	CC(C)CCCC(C)C1CCC2(C1(CCC3=C2CCC4C3(CCC(C4(C)C)O)C)C)C
Lycium barbarum L.	MOL009678	lanost-8-enol	428.82	8.37	1	1	34.2263	1.3709	1.1177	0.74167	0.221859	6.41394		C1(O)CCC4(C)C(CCC2=C4CCC3(C)C2(CCC3C(C)CCCC(C)C)C)C1(C)C
Lycium barbarum L.	MOL009681	Obtusifoliol	426.8	8.152	1	1	42.552	1.46931	1.25222	0.7565	0.238438	5.91285	65252	CC1C2CCC3=C(C2(CCC1O)C)CCC4(C3(CCC4C(C)CCC(=C)C(C)C)C)C
Lycium barbarum L.	MOL010234	delta-Carotene	536.96	12.185	0	0	31.8009	2.32916	1.42231	0.54639	0.35116	2.61679	5281230	CC1=CCCC(C1C=CC(=CC=CC(=CC=CC=C(C)C=CC=C(C)C=CC=C(C)CCC=C(C)C)C)C)(C)C
Lycium barbarum L.	MOL002773	beta-carotene	536.96	12	0	0	37.18	2.25	1.52	0.58	0.33	4.36	5280489	CC1=C(C(CCC1)(C)C)C=CC(=CC=CC(=CC=CC=C(C)C=CC=C(C)C=CC2=C(CCCC2(C)C)C)C)C
Lycium barbarum L.	MOL012888	citrostadienol	426.8	8.15	1	1	43.28	1.41	0.96	0.79	0.24	5.66		OC4C(C)C3C(CC4)(C)C2C(C1C(CC2)(C)C(C(C)CCC(C(C)C)=CC)CC1)=CC3
Lycium barbarum L.	MOL000359	sitosterol	414.79	8.08	1	1	36.91	1.32	0.87	0.75	0.22	5.37	12303645	CCC(CCC(C)C1CCC2C1(CCC3C2CC=C4C3(CCC(C4)O)C)C)C(C)C
Morus alba L.	MOL000098	quercetin	302.25	1.5	5	7	46.43	0.05	-0.77	0.28	0.38	14.4	5280343	C1=CC(=C(C=C1C2=C(C(=O)C3=C(C=C(C=C3O2)O)O)O)O)O
Morus alba L.	MOL000422	kaempferol	286.25	1.77	4	6	41.88	0.26	-0.55	0.24	0	14.74	5280863	C1=CC(=CC=C1C2=C(C(=O)C3=C(C=C(C=C3O2)O)O)O)O
Morus alba L.	MOL000358	beta-sitosterol	414.79	8.08	1	1	36.91	1.32	0.99	0.75	0.23	5.36	222284	CCC(CCC(C)C1CCC2C1(CCC3C2CC=C4C3(CCC(C4)O)C)C)C(C)C
Morus alba L.	MOL000737	morin	302.25	1.5	5	7	46.23	0	-0.77	0.27	0.41	15.51	5281670	C1=CC(=C(C=C1O)O)C2=C(C(=O)C3=C(C=C(C=C3O2)O)O)O
Morus alba L.	MOL002372	(6Z,10E,14E,18E)-2,6,10,15,19,23-hexamethyltetracosa-2,6,10,14,18,22-hexaene	410.8	11.33	0	0	33.55	2.07	1.77	0.42	0.27	3.15	11975273	CC(=CCCC(=CCCC(=CCCC=C(C)CCC=C(C)CCC=C(C)C)C)C)C
Morus alba L.	MOL002773	beta-carotene	536.96	12	0	0	37.18	2.25	1.52	0.58	0.33	4.36	5280489	CC1=C(C(CCC1)(C)C)C=CC(=CC=CC(=CC=CC=C(C)C=CC=C(C)C=CC2=C(CCCC2(C)C)C)C)C
Morus alba L.	MOL010300	dIDP	446.74	9.26	0	4	41.08	0.91	0.26	0.57	0.28	1.96	33599	CC(C)CCCCCCCOC(=O)C1=CC=CC=C1C(=O)OCCCCCCCC(C)C
Morus alba L.	MOL006209	cyanin	411.66	7.08	0	1	47.42	1.78	0.99	0.76	0.28	2.72		c12c(N(CCC(C)C)C=CC1=Cc3c4c(cccc4)n(CCC(C)C)cc3)cccc2
Angelica sinensis (Oliv.) Diels	MOL000358	beta-sitosterol	414.79	8.08	1	1	36.91	1.32	0.99	0.75	0.23	5.36	222284	CCC(CCC(C)C1CCC2C1(CCC3C2CC=C4C3(CCC(C4)O)C)C)C(C)C
Angelica sinensis (Oliv.) Diels	MOL000449	Stigmasterol	412.77	7.64	1	1	43.83	1.44	1	0.76	0.22	5.57	5280794	CCC(C=CC(C)C1CCC2C1(CCC3C2CC=C4C3(CCC(C4)O)C)C)C(C)C
Angelica sinensis (Oliv.) Diels	MOL004492	Chrysanthemaxanthin	584.96	8.24	2	3	38.72	0.51	-0.98	0.58	0.3	17.47		C1C(O)CC2(C)C(C1(C)C)=CC(C(C)=CC=CC(C)=CC=CC=C(C)C=CC=C(C)C=CC3C(C)=CC(O)CC3(C)C)O2
Angelica sinensis (Oliv.) Diels	MOL001956	Cnidilin	300.33	3.64	0	5	32.69	1.03	0.52	0.28	0.23	-1.33	821449	CC(=CCOC1=C2C=COC2=C(C3=C1C=CC(=O)O3)OC)C
Angelica sinensis (Oliv.) Diels	MOL001942	isoimperatorin	270.3	3.65	0	4	45.46	0.97	0.66	0.23	0.27	-1.44	68081	CC(=CCOC1=C2C=CC(=O)OC2=CC3=C1C=CO3)C
Angelica sinensis (Oliv.) Diels	MOL006812	Phyllanthin	418.58	4.11	0	6	33.31	1.06	0.57	0.42	0.15	3.36	358901	COCC(CC1=CC(=C(C=C1)OC)OC)C(CC2=CC(=C(C=C2)OC)OC)COC
Angelica sinensis (Oliv.) Diels	MOL005384	suchilactone	368.41	3.73	0	6	57.52	0.82	0.28	0.56	0.28	9.03		COc1c(OC)ccc(CC2C(C(OC2)=O)=Cc3ccc4c(OCO4)c3)c1
Corethrodendron multijugum (Maxim.) B.H.Choi & H.Ohashi	MOL000211	Mairin	456.78	6.52	2	3	55.38	0.73	0.22	0.78	0.26	8.87	64971	CC(=C)C1CCC2(C1C3CCC4C5(CCC(C(C5CCC4(C3(CC2)C)C)(C)C)O)C)C(=O)O
Corethrodendron multijugum (Maxim.) B.H.Choi & H.Ohashi	MOL000239	Jaranol	314.31	2.09	2	6	50.83	0.61	-0.22	0.29	0.29	15.5	5318869	COC1=CC(=C2C(=C1)OC(=C(C2=O)OC)C3=CC=C(C=C3)O)O
Corethrodendron multijugum (Maxim.) B.H.Choi & H.Ohashi	MOL000296	hederagenin	414.79	8.08	1	1	36.91	1.32	0.96	0.75	0	5.35		OC2CCC4(C)C(C2)=CCC3C1CCC(C1(CCC34)C)C(C)CCC(C(C)C)CC
Corethrodendron multijugum (Maxim.) B.H.Choi & H.Ohashi	MOL000033	(3S,8S,9S,10R,13R,14S,17R)-10,13-dimethyl-17-[(2R,5S)-5-propan-2-yloctan-2-yl]-2,3,4,7,8,9,11,12,14,15,16,17-dodecahydro-1H-cyclopenta[a]phenanthren-3-ol	428.82	8.54	1	1	36.23	1.45	1.09	0.78	0	5.22	15976101	CCCC(CCC(C)C1CCC2C1(CCC3C2CC=C4C3(CCC(C4)O)C)C)C(C)C
Corethrodendron multijugum (Maxim.) B.H.Choi & H.Ohashi	MOL000354	isorhamnetin	316.28	1.76	4	7	49.6	0.31	-0.54	0.31	0.32	14.34	5281654	COC1=C(C=CC(=C1)C2=C(C(=O)C3=C(C=C(C=C3O2)O)O)O)O
Corethrodendron multijugum (Maxim.) B.H.Choi & H.Ohashi	MOL000371	3,9-di-O-methylnissolin	314.36	2.89	0	5	53.74	1.18	0.63	0.48	0	9	15689655	COC1=CC2=C(C=C1)C3C(CO2)C4=C(O3)C(=C(C=C4)OC)OC
Corethrodendron multijugum (Maxim.) B.H.Choi & H.Ohashi	MOL000374	5'-hydroxyiso-muronulatol-2',5'-di-O-glucoside	642.67	-0.95	9	16	41.72	-2.47	-3.62	0.69	0	2.52		c1(O)ccc2c(OCC(c3c(OC4OC(CO)C(O)C(O)C4O)c(OC)c(OC)c(OC5OC(CO)C(O)C(O)C5O)c3)C2)c1
Corethrodendron multijugum (Maxim.) B.H.Choi & H.Ohashi	MOL000378	7-O-methylisomucronulatol	316.38	3.38	1	5	74.69	1.08	0.84	0.3	0	2.98	15689652	COC1=CC2=C(CC(CO2)C3=C(C(=C(C=C3)OC)OC)O)C=C1
Corethrodendron multijugum (Maxim.) B.H.Choi & H.Ohashi	MOL000379	9,10-dimethoxypterocarpan-3-O-β-D-glucoside	462.49	0.74	4	10	36.74	-0.63	-1.5	0.92	0	13.06		O(c4cc3c(C2C(c5c(O2)c(OC)c(OC)cc5)CO3)cc4)C1C(C(C(C(CO)O1)O)O)O
Corethrodendron multijugum (Maxim.) B.H.Choi & H.Ohashi	MOL000380	(6aR,11aR)-9,10-dimethoxy-6a,11a-dihydro-6H-benzofurano[3,2-c]chromen-3-ol	300.33	2.64	1	5	64.26	0.93	0.55	0.42	0	8.49	14077830	COC1=C(C2=C(C=C1)C3COC4=C(C3O2)C=CC(=C4)O)OC
Corethrodendron multijugum (Maxim.) B.H.Choi & H.Ohashi	MOL000387	Bifendate	418.38	2.56	0	10	31.1	0.15	-0.06	0.67	0	17.96	108213	COC1=C2C(=C(C(=C1)C(=O)OC)C3=C4C(=C(C=C3C(=O)OC)OC)OCO4)OCO2
Corethrodendron multijugum (Maxim.) B.H.Choi & H.Ohashi	MOL000392	formononetin	268.28	2.58	1	4	69.67	0.78	0.02	0.21	0	17.04	5280378	COC1=CC=C(C=C1)C2=COC3=C(C2=O)C=CC(=C3)O
Corethrodendron multijugum (Maxim.) B.H.Choi & H.Ohashi	MOL000398	isoflavanone	316.33	2.42	2	6	109.99	0.53	0.17	0.3	0	15.51		C1C(c3ccc(O)cc3O)C(c2c(O1)ccc(OC)c2OC)=O
Corethrodendron multijugum (Maxim.) B.H.Choi & H.Ohashi	MOL000417	Calycosin	284.28	2.32	2	5	47.75	0.52	-0.43	0.24	0	17.1	5280448	COC1=C(C=C(C=C1)C2=COC3=C(C2=O)C=CC(=C3)O)O
Corethrodendron multijugum (Maxim.) B.H.Choi & H.Ohashi	MOL000422	kaempferol	286.25	1.77	4	6	41.88	0.26	-0.55	0.24	0	14.74	5280863	C1=CC(=CC=C1C2=C(C(=O)C3=C(C=C(C=C3O2)O)O)O)O
Corethrodendron multijugum (Maxim.) B.H.Choi & H.Ohashi	MOL000433	FA	441.45	0.01	7	13	68.96	-1.5	-2.59	0.71	0	24.81	6037	C1=CC(=CC=C1C(=O)NC(CCC(=O)O)C(=O)O)NCC2=CN=C3C(=N2)C(=O)N=C(N3)N
Corethrodendron multijugum (Maxim.) B.H.Choi & H.Ohashi	MOL000438	(3R)-3-(2-hydroxy-3,4-dimethoxyphenyl)chroman-7-ol	302.35	3.13	2	5	67.67	0.96	0.34	0.26	0	2.9	10380176	COC1=C(C(=C(C=C1)C2CC3=C(C=C(C=C3)O)OC2)O)OC
Corethrodendron multijugum (Maxim.) B.H.Choi & H.Ohashi	MOL000439	isomucronulatol-7,2'-di-O-glucosiole	626.67	-0.68	8	15	49.28	-2.22	-3.36	0.62	0	0.93	15689653	COC1=C(C(=C(C=C1)C2CC3=C(C=C(C=C3)OC4C(C(C(C(O4)CO)O)O)O)OC2)OC5C(C(C(C(O5)CO)O)O)O)OC
Corethrodendron multijugum (Maxim.) B.H.Choi & H.Ohashi	MOL000442	1,7-Dihydroxy-3,9-dimethoxy pterocarpene	314.31	3.11	2	6	39.05	0.89	-0.04	0.48	0	7.95	5316760	COC1=CC(=C2C(=C1)OCC3=C2OC4=CC(=CC(=C34)O)OC)O
Corethrodendron multijugum (Maxim.) B.H.Choi & H.Ohashi	MOL000098	quercetin	302.25	1.5	5	7	46.43	0.05	-0.77	0.28	0.38	14.4	5280343	C1=CC(=C(C=C1C2=C(C(=O)C3=C(C=C(C=C3O2)O)O)O)O)O
Corethrodendron multijugum (Maxim.) B.H.Choi & H.Ohashi	MOL000358	beta-sitosterol	414.79	8.08	1	1	36.91	1.32	0.99	0.75	0.23	5.36	222284	CCC(CCC(C)C1CCC2C1(CCC3C2CC=C4C3(CCC(C4)O)C)C)C(C)C
Corethrodendron multijugum (Maxim.) B.H.Choi & H.Ohashi	MOL004492	Chrysanthemaxanthin	584.96	8.24	2	3	38.72	0.51	-0.98	0.58	0.3	17.47		C1C(O)CC2(C)C(C1(C)C)=CC(C(C)=CC=CC(C)=CC=CC=C(C)C=CC=C(C)C=CC3C(C)=CC(O)CC3(C)C)O2
Corethrodendron multijugum (Maxim.) B.H.Choi & H.Ohashi	MOL000359	sitosterol	414.79	8.08	1	1	36.91	1.32	0.87	0.75	0.22	5.37	12303645	CCC(CCC(C)C1CCC2C1(CCC3C2CC=C4C3(CCC(C4)O)C)C)C(C)C
